# Supplementary material for: Nigericin Boosts Anti-Tumor Immune Response via Inducing Pyroptosis in Triple-Negative Breast Cancer
Source: MDPI journal article supplement (doi:10.3390/cancers15123221), 2023-06-16

These supplementary data contain 15 supplementary figures and 2 supplementary tables.

**Figure S1, related to Figure 1.**

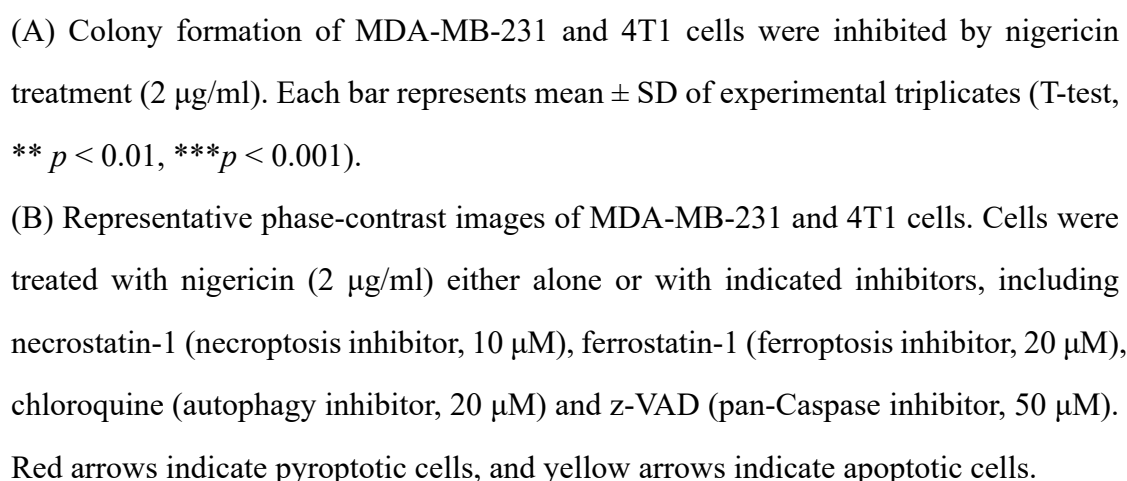

**Figure S2, related to Figure 2.**

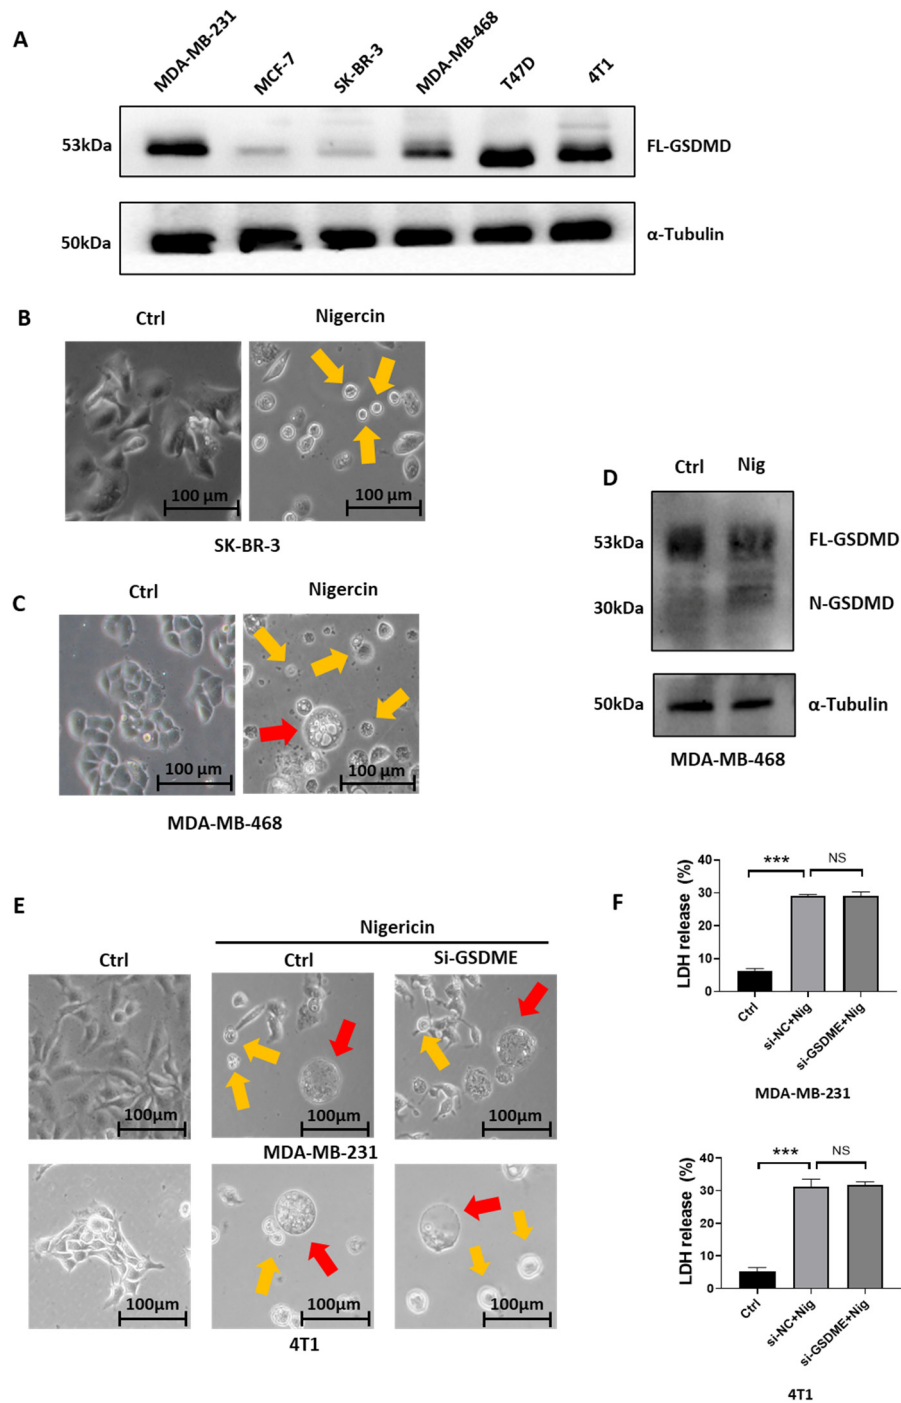

(A) Western blots detected the total GSDMD expressions of different breast cancer cell lines.

(B) Representative phase-contrast images of SK-BR-3 cells treated with nigericin or not. Red arrows indicate pyroptotic cells, and yellow arrows indicate apoptotic cells.

(C) Representative phase-contrast images of MDA-MB-468 cells treated with nigericin

or not. Red arrows indicate pyroptotic cells, and yellow arrows indicate apoptotic cells.

(D) Western blots detected the GSDMD changes in MDA-MB-468 cells upon nigericin treatment.

(E) Representative phase-contrast images of TNBC cells with GSDME knocking down or not, followed by nigericin treatment (2  $\mu\text{g/ml}$  for 24 h). Red arrows indicate pyroptotic cells, and yellow arrows indicate apoptotic cells.

(F) LDH released from TNBC cells with GSDME knocking down or not, treated with nigericin (2  $\mu\text{g/ml}$  for 12 h). Bar graphs represent means  $\pm$  SD of experimental triplicates (one-way ANOVA,  $**p < 0.01$ ).

**Figure S3, related to Figure 4-5.**

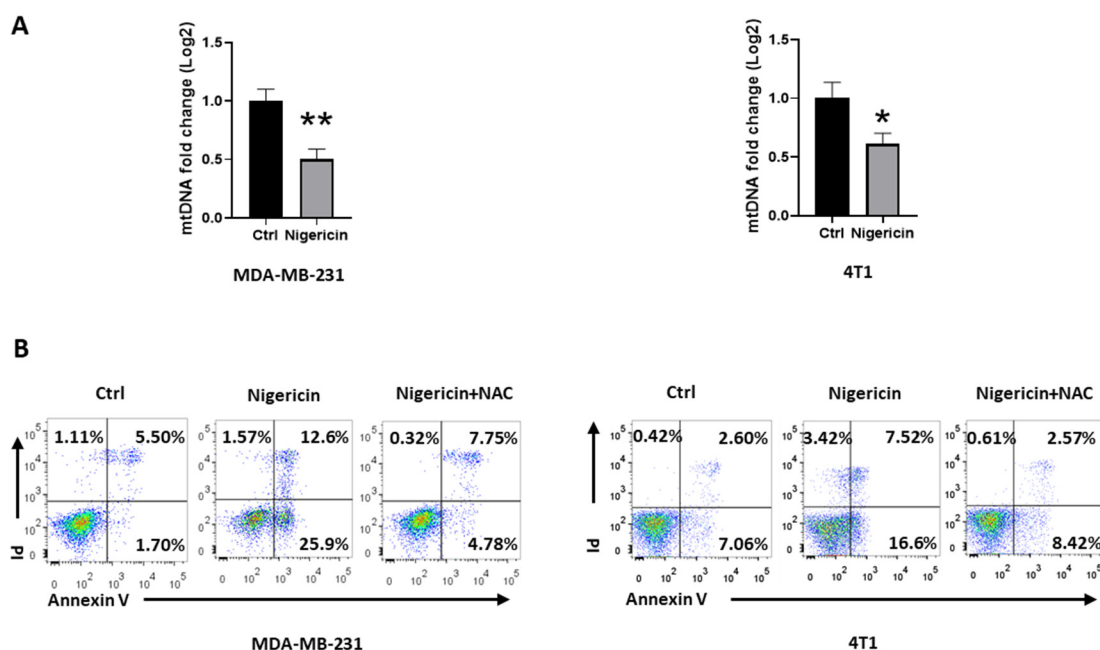

(A) Quantitative real-time PCR analysis of cytosolic mtDNA level in MDA-MB-231 and 4T1 cells upon nigericin treatment (2  $\mu\text{g/ml}$ ). Each bar represent mean  $\pm$  SD of experimental triplicates (T-test,  $*p < 0.05$ ,  $**p < 0.01$ ).

(B) Flow cytometry detected PI and Annexin V stained TNBC cells treated with indicated reagents (nigericin 2  $\mu\text{g/ml}$ , NAC 5 mM).

**Figure S4, related to Figure 6.**

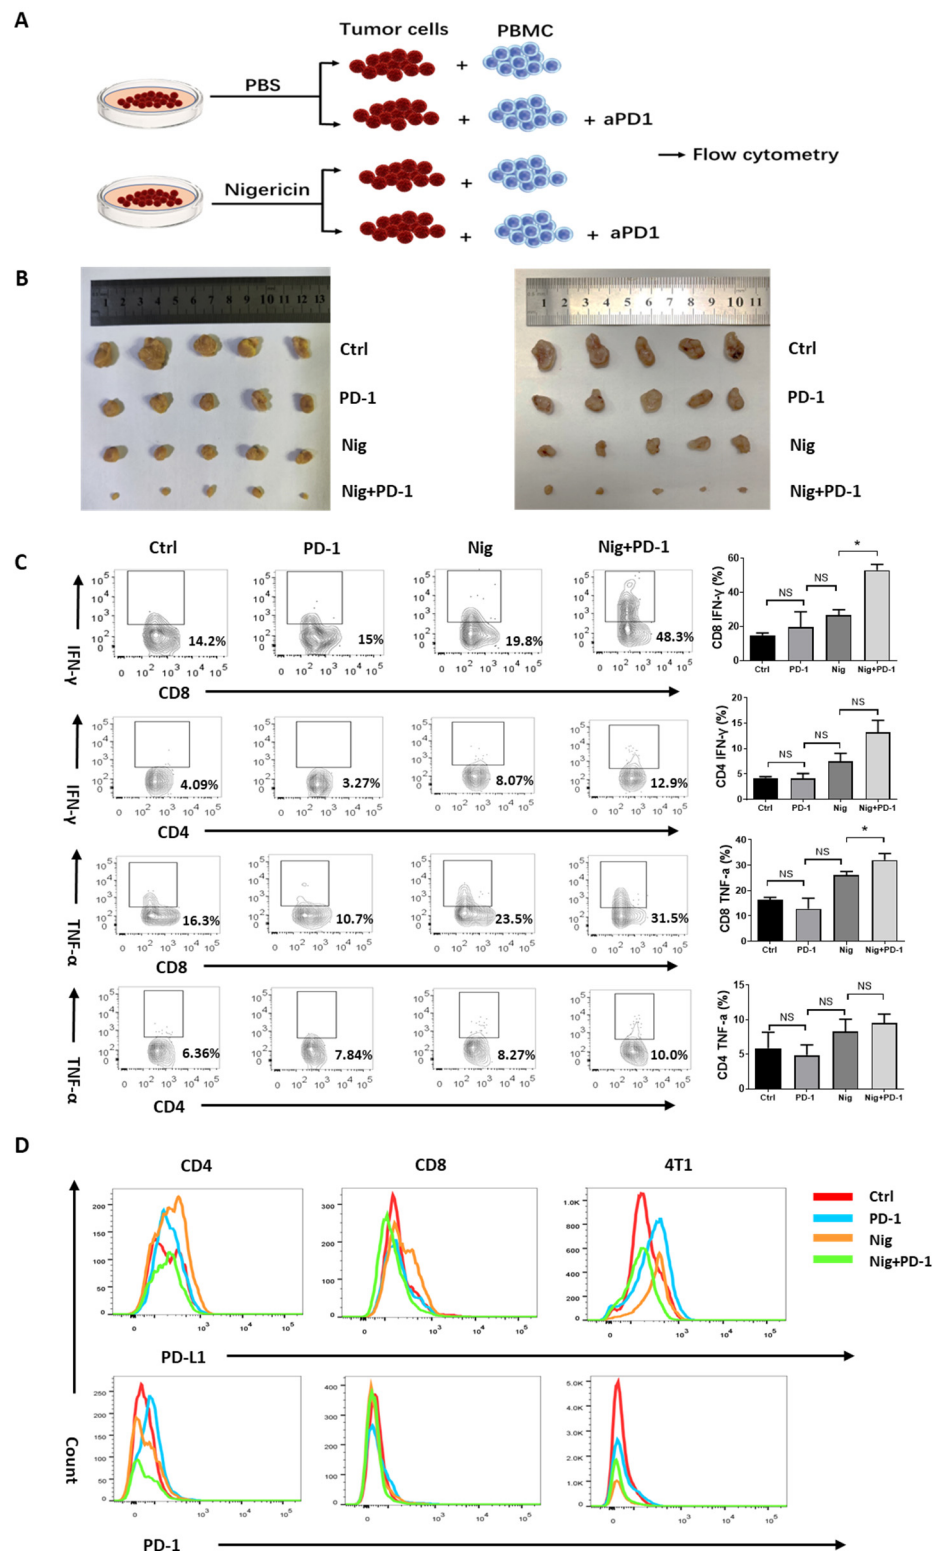

(A) Schematic diagram showed that MDA-MB-231 cells treated with either nigericin or not were cultured with PBMC isolated from human healthy donors, followed with or without anti-PD-1 treatment.

- (B) Represent images of the other two replicate *in vivo* experiments.
- (C) Flow cytometry analysis of IFN- $\gamma$  or TNF- $\alpha$  secreted by CD4<sup>+</sup> and CD8<sup>+</sup> T cells. Displayed are means  $\pm$  SD of different groups (one-way ANOVA, \* $p < 0.05$ ).
- (D) The expressions of PD-1 or PD-L1 in T cells and cancer cells, detected by flow cytometry.

**Figure S5, related to Figure 6.**

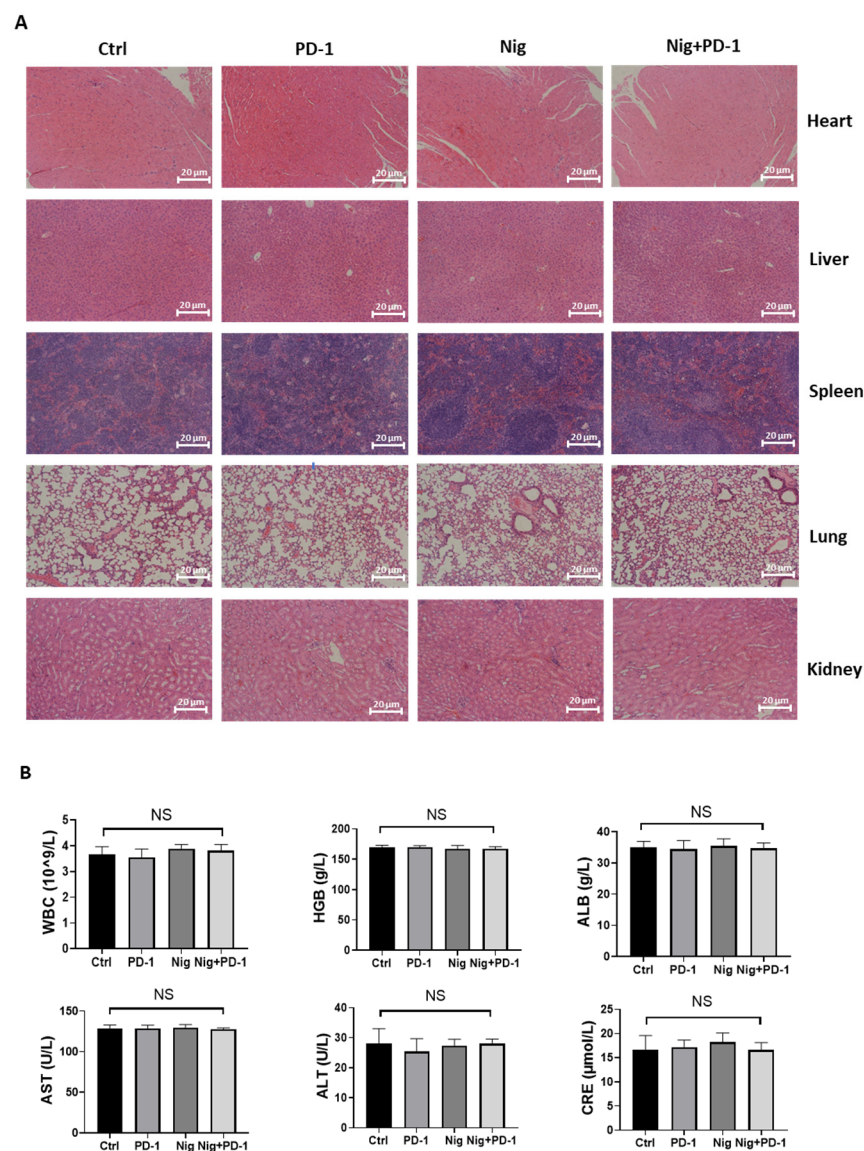

- (A) Representative HE stained section images of mouse organs treated with indicated reagents, including the heart, lung, liver, kidney and spleen.
- (B) Hematologic and biochemical values of mice treated with indicated reagents. Each bar represent mean  $\pm$  SD (one-way ANOVA).

**Table S1. Antibodies Used in WB, IF/IHC and FCM**

| <b>Antibody</b>                                   | <b>Company</b>            | <b>Cat.</b> | <b>Application</b> | <b>Dilution rate</b>            |
|---------------------------------------------------|---------------------------|-------------|--------------------|---------------------------------|
| Mouse pro Caspase-1                               | Cell Signaling Technology | 24232       | WB                 | 1:1000                          |
| Human pro Caspase-1                               | Cell Signaling Technology | 3866        | WB                 | 1:1000                          |
| Mouse cleaved Caspase-1                           | Cell Signaling Technology | 89332       | WB                 | 1:1000                          |
| Human cleaved Caspase-1                           | Cell Signaling Technology | 4199        | WB                 | 1:1000                          |
| Pro Caspase-3                                     | Cell Signaling Technology | 9662        | WB                 | 1:1000                          |
| Cleaved Caspase-3                                 | Cell Signaling Technology | 9664        | WB                 | 1:1000                          |
| GSDMD                                             | Cell Signaling Technology | 93709       | WB                 | 1:1000                          |
| GSDME                                             | Abcam                     | ab215191    | WB                 | 1:1000                          |
| PD-L1                                             | Proteintech               | 17952-1-AP  | WB                 | 1:500                           |
| HMGB1                                             | Proteintech               | 10829-1-AP  | WB                 | 1:2000                          |
| Caspase-1                                         | Proteintech               | 22915-1-AP  | WB                 | 1:2000                          |
| $\alpha$ -Tubulin                                 | Proteintech               | 66031-1-Ig  | WB                 | 1:5000                          |
| Parp-1                                            | Proteintech               | 13371-1-AP  | WB                 | 1:2000                          |
| HRP-conjugated Affinipure<br>Goat Anti-Rabbit IgG | Proteintech               | SA00001-2   | WB                 | 1:3000                          |
| HRP-conjugated Affinipure<br>Goat Anti-Mouse IgG  | Proteintech               | SA00001-1   | WB                 | 1:3000                          |
| GSDMD N-terminal                                  | Affinity                  | AF4012      | IF                 | 1:100                           |
| Alexa Fluor® 594-<br>conjugated Anti-Rabbit IgG   | Cell Signaling Technology | 8889S       | IF                 | 1:1000                          |
| Cleaved Caspase-1                                 | Thermo Fisher             | PA5-99390   | IHC                | 1:100                           |
| Cleaved Caspase-3                                 | Cell Signaling Technology | 9579        | IHC                | 1:250                           |
| APC human CD45                                    | Biolegend                 | 304012      | FCM                | 5 $\mu$ l/10 <sup>6</sup> cells |
| FITC human CD4                                    | Biolegend                 | 357406      | FCM                | 5 $\mu$ l/10 <sup>6</sup> cells |
| PerCP human CD8                                   | Biolegend                 | 344707      | FCM                | 5 $\mu$ l/10 <sup>6</sup> cells |
| PE human TNF- $\alpha$                            | Biolegend                 | 502908      | FCM                | 5 $\mu$ l/10 <sup>6</sup> cells |
| APC mouse CD45                                    | Biolegend                 | 103112      | FCM                | 5 $\mu$ l/10 <sup>6</sup> cells |

|                 |             |            |     |                              |
|-----------------|-------------|------------|-----|------------------------------|
| FITC mouse CD4  | Biolegend   | 100510     | FCM | 0.25µg/10 <sup>6</sup> cells |
| PerCP mouse CD8 | Biolegend   | 100731     | FCM | 0.25µg/10 <sup>6</sup> cells |
| PE mouse TNF-α  | eBioscience | 12-7321-81 | FCM | 5µl/10 <sup>6</sup> cells    |
| APC mouse INF-γ | Biolegend   | 505809     | FCM | 1µg/10 <sup>6</sup> cells    |
| PE mouse PD-1   | Biolegend   | 135205     | FCM | 1µg/10 <sup>6</sup> cells    |
| PE mouse PD-L1  | Biolegend   | 124308     | FCM | 0.25µg/10 <sup>6</sup> cells |

WB, western blot; IF, immunofluorescence; IHC, Immunohistochemistry; FCM, flow cytometry;

**Table S2. siRNA sequences**

| Gene            | siRNA Sequence                  |
|-----------------|---------------------------------|
| Mouse Caspase-1 | 5'-GGGACCUAUGUGAUGUCUCUAA-3'    |
| Human Caspase-1 | 5'-GGAAGUGAAGAGAUCCUUCUGUAAA-3' |
| Mouse Caspase-3 | 5'-GCACTGGAATGTCAGCTCG-3'       |
| Human Caspase-3 | 5'-GGAAUAUCCCUGGACAACA-3'       |
| Mouse GSDMD     | 5'-CCGAGGUGCUGCAGACAAA-3'       |
| Human GSDMD     | 5'-GUGUCAACCUGUCUAUCA-3'        |
| Mouse GSDME     | 5'-GCTGCAAACCTCCATGTTAT-3'      |
| Human GSDME     | 5'-CCAUUGCCUACGGUGUCAUTT-3'     |



Figure S6 related to Figure 1E

Experiment 1

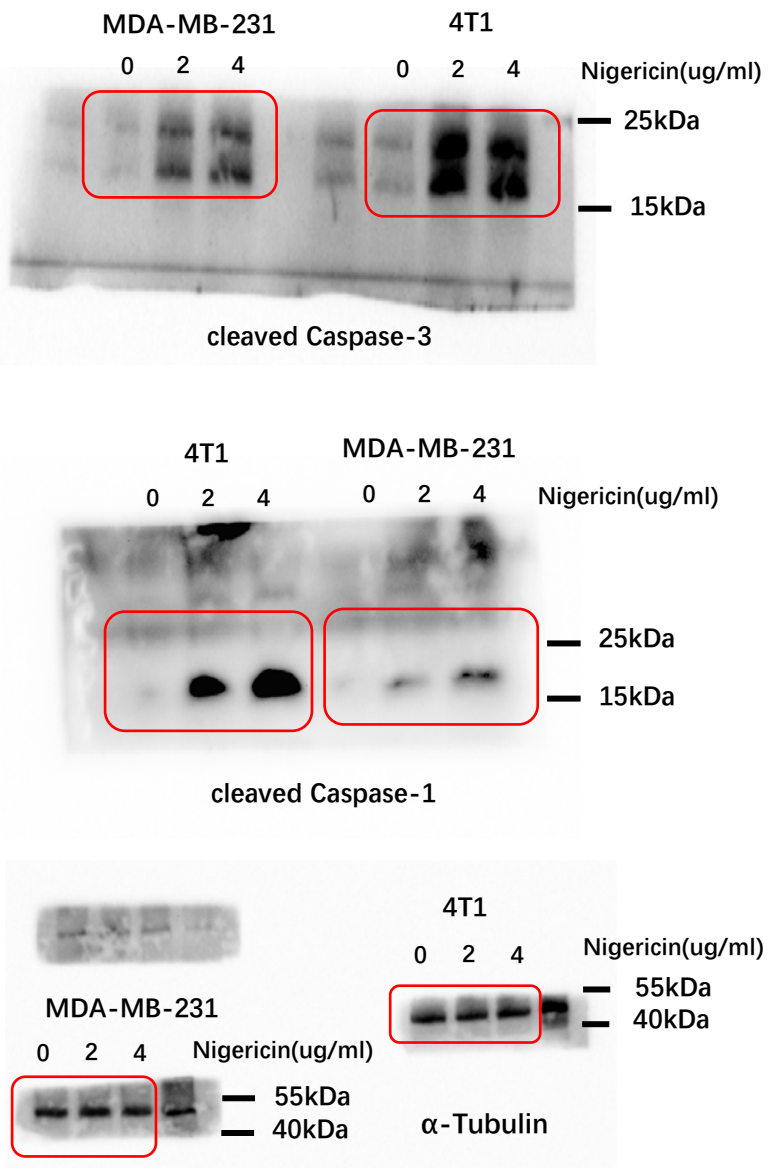

Experiment 2

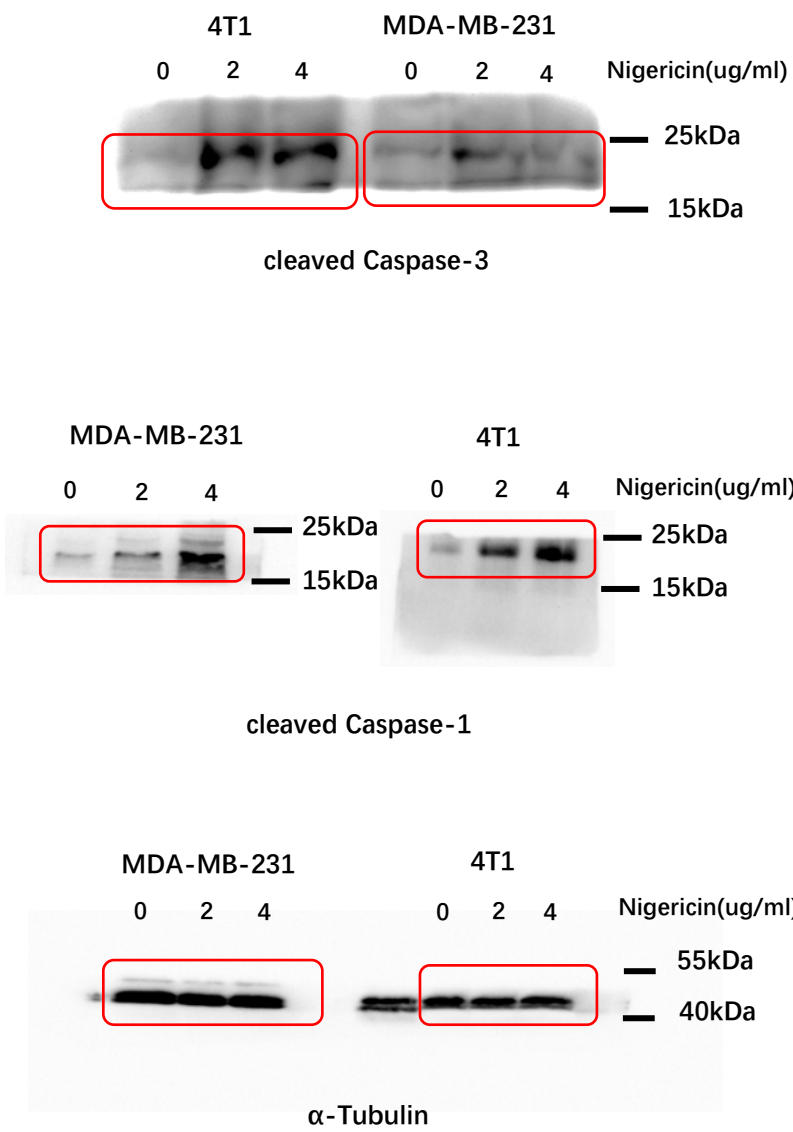

Experiment 3

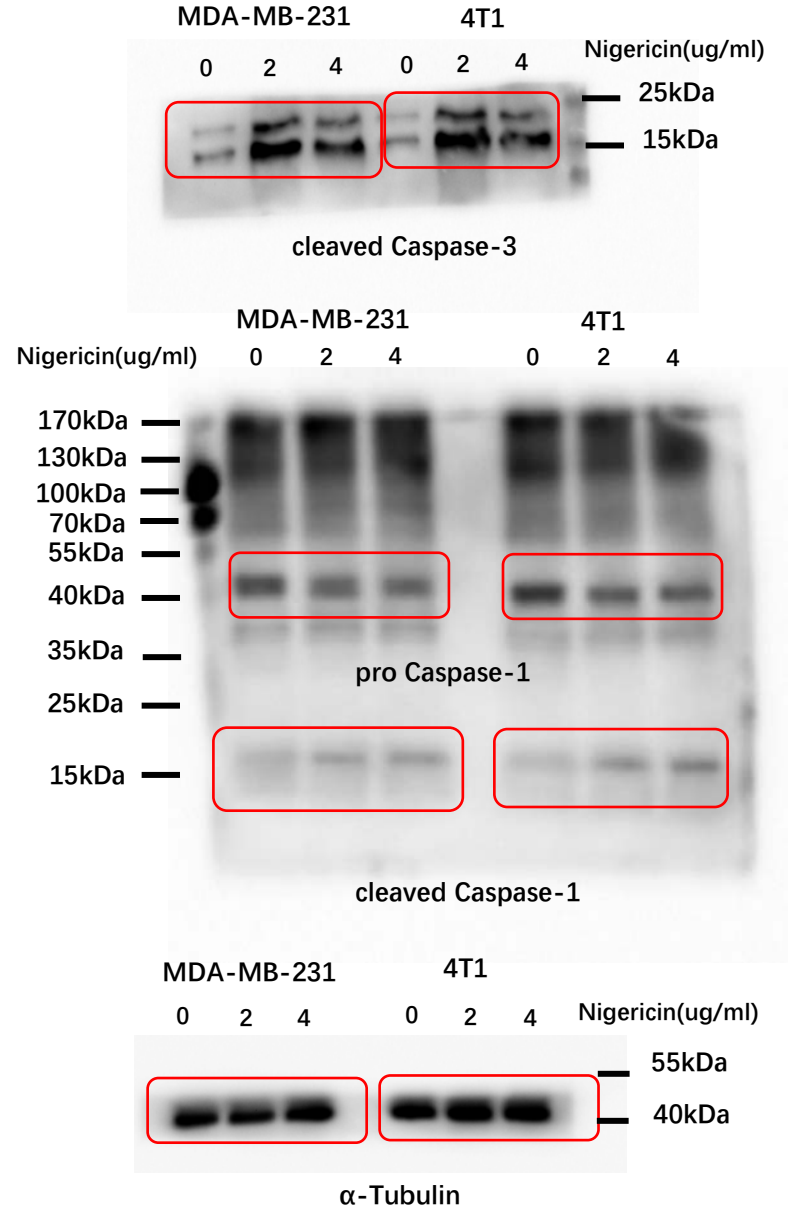



Figure S7 related to Figure 2A

Experiment 1

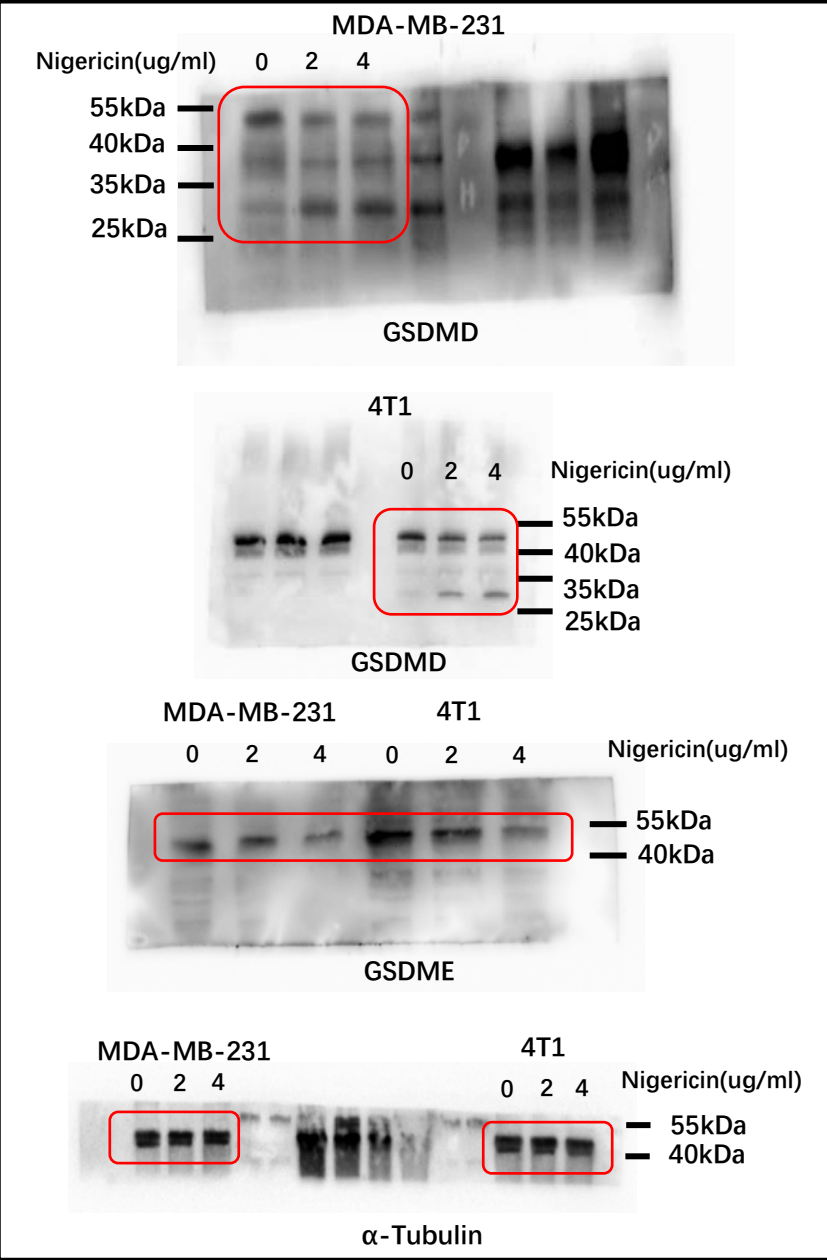

Experiment 2

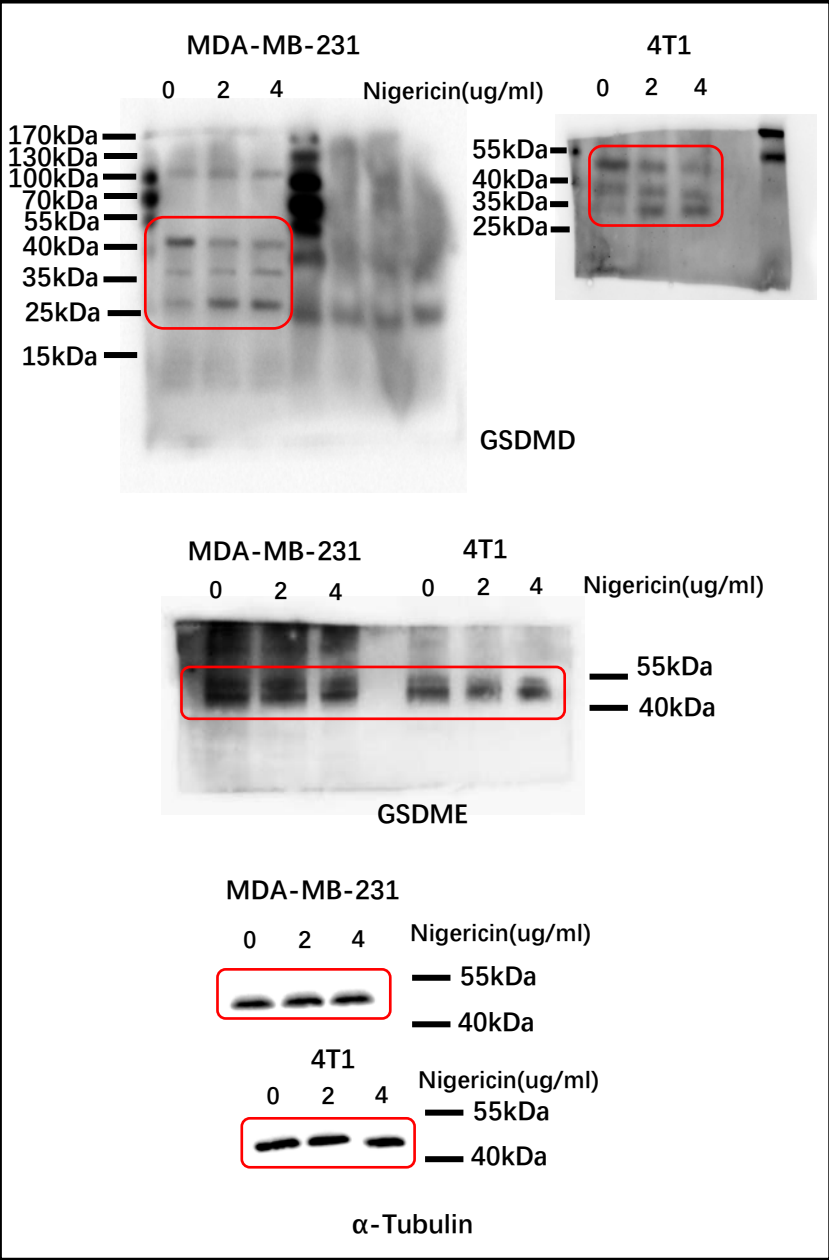

Experiment 3

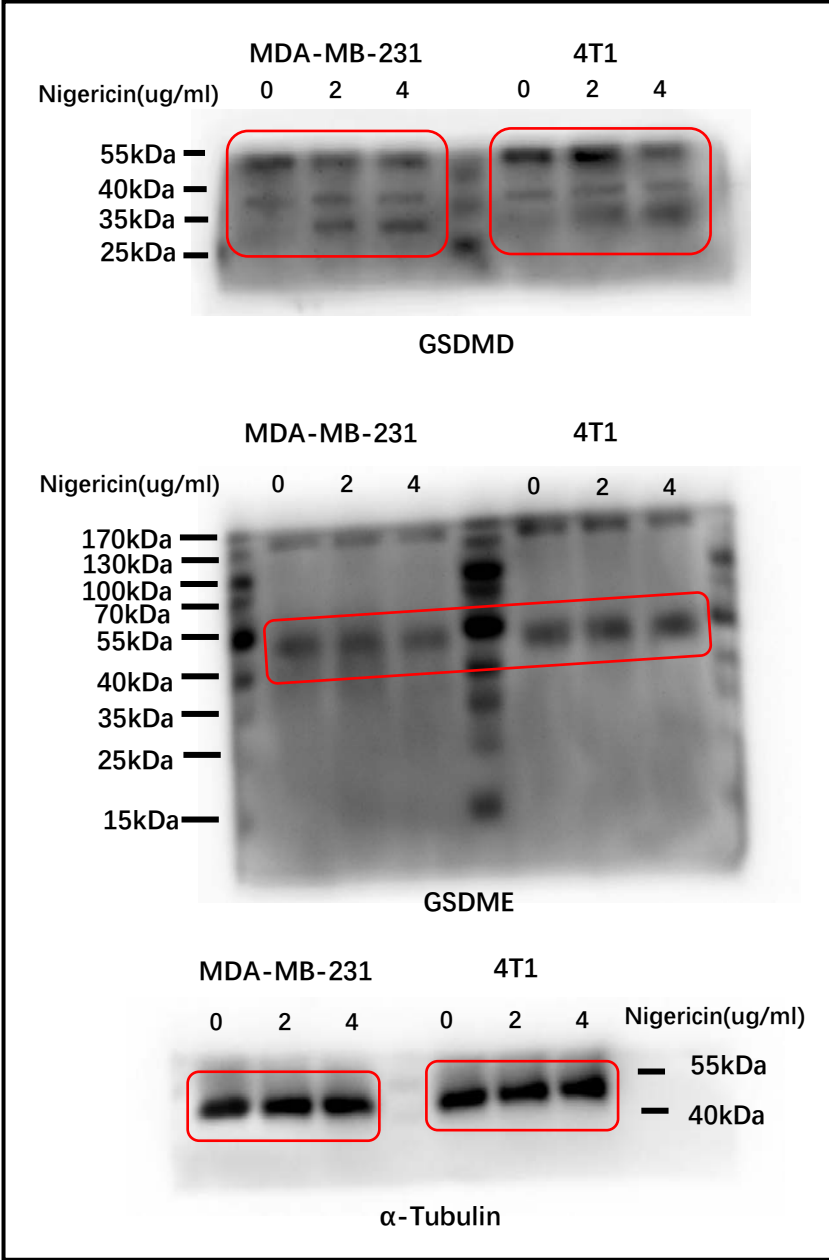

Figure S8 related to Figure 2E

Experiment 1

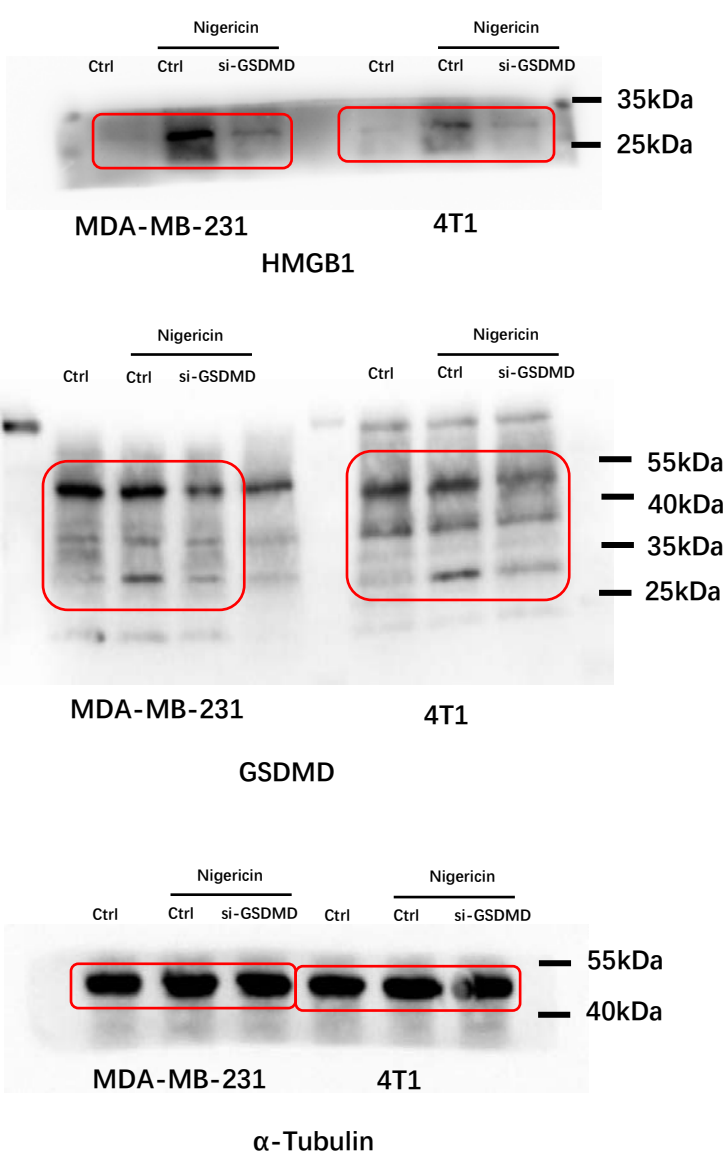

Experiment 2

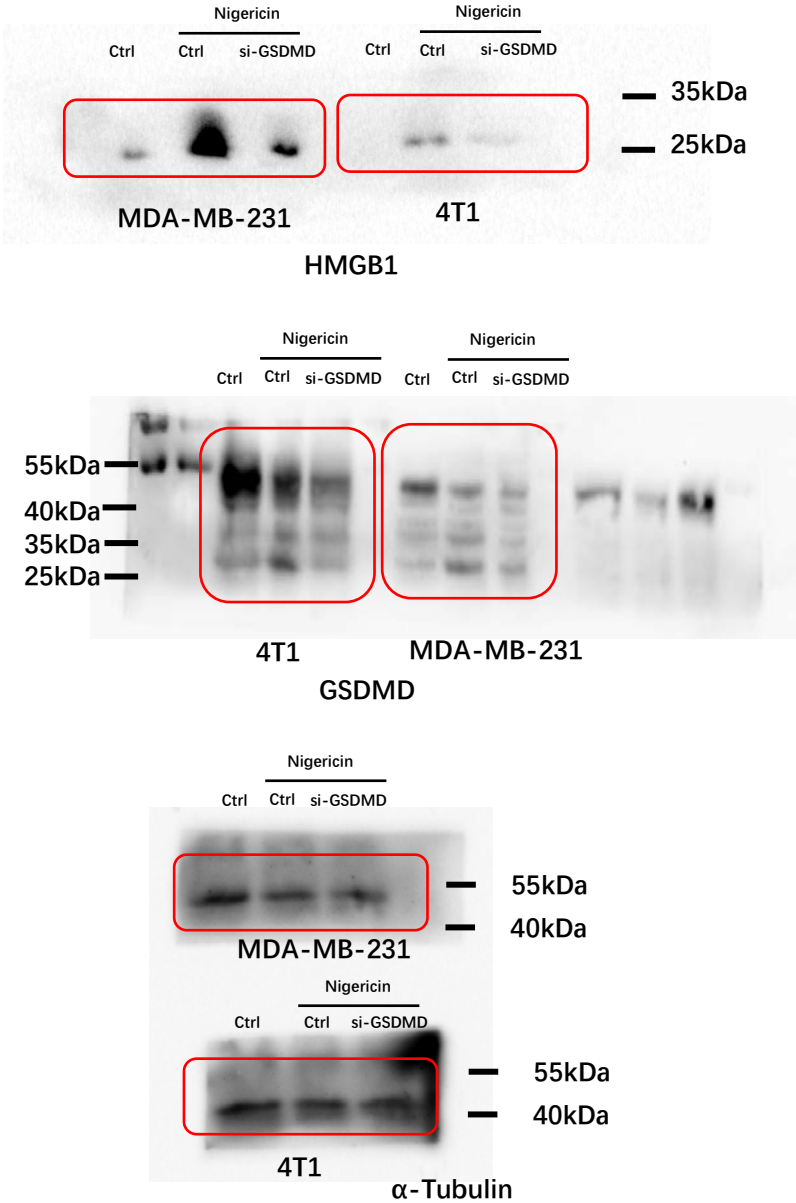

Experiment 3

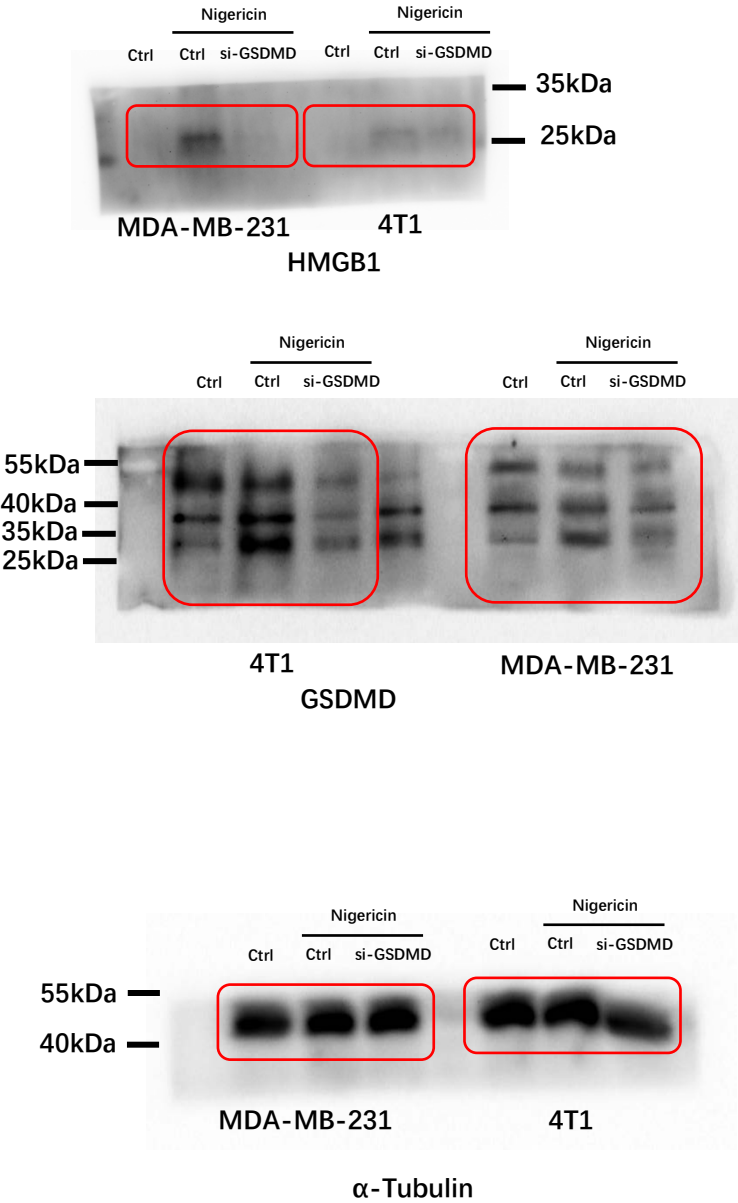

Figure S9 related to Figure 4B

Experiment 1

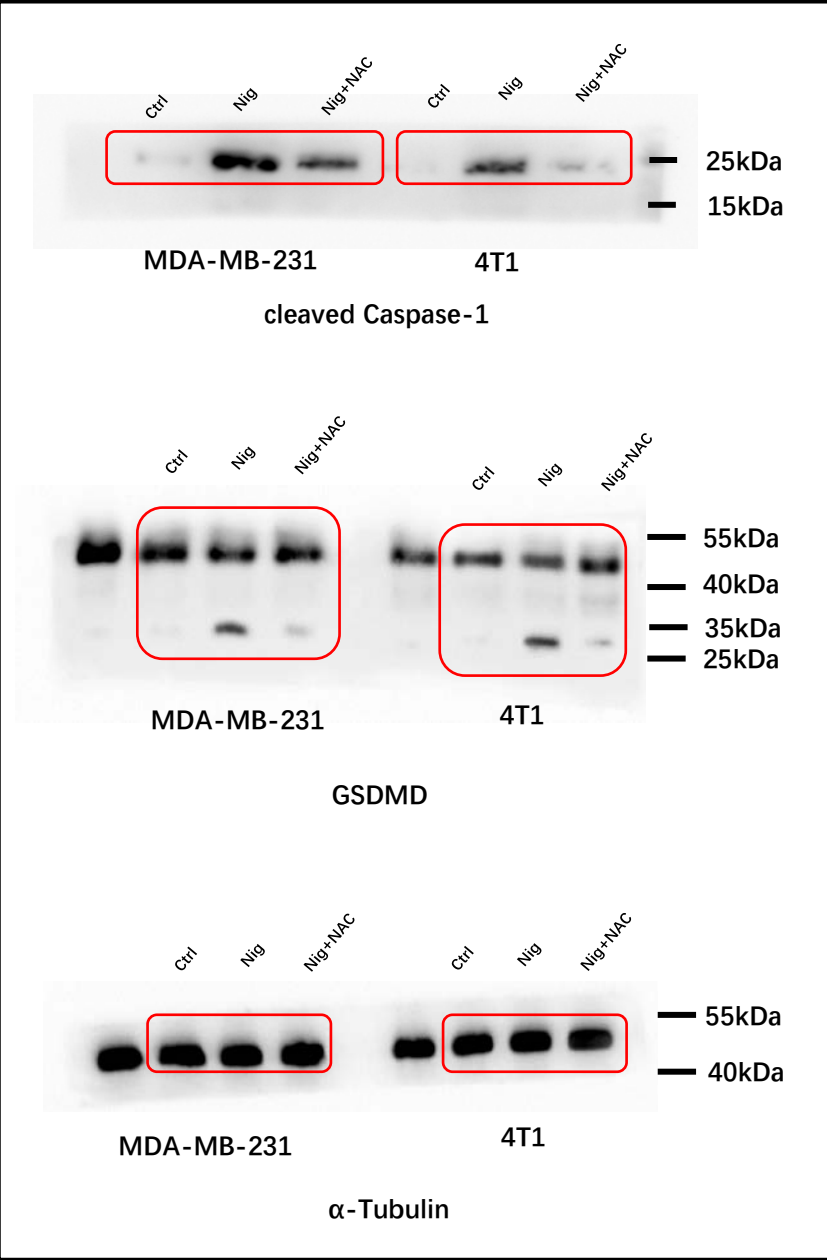

Experiment 2

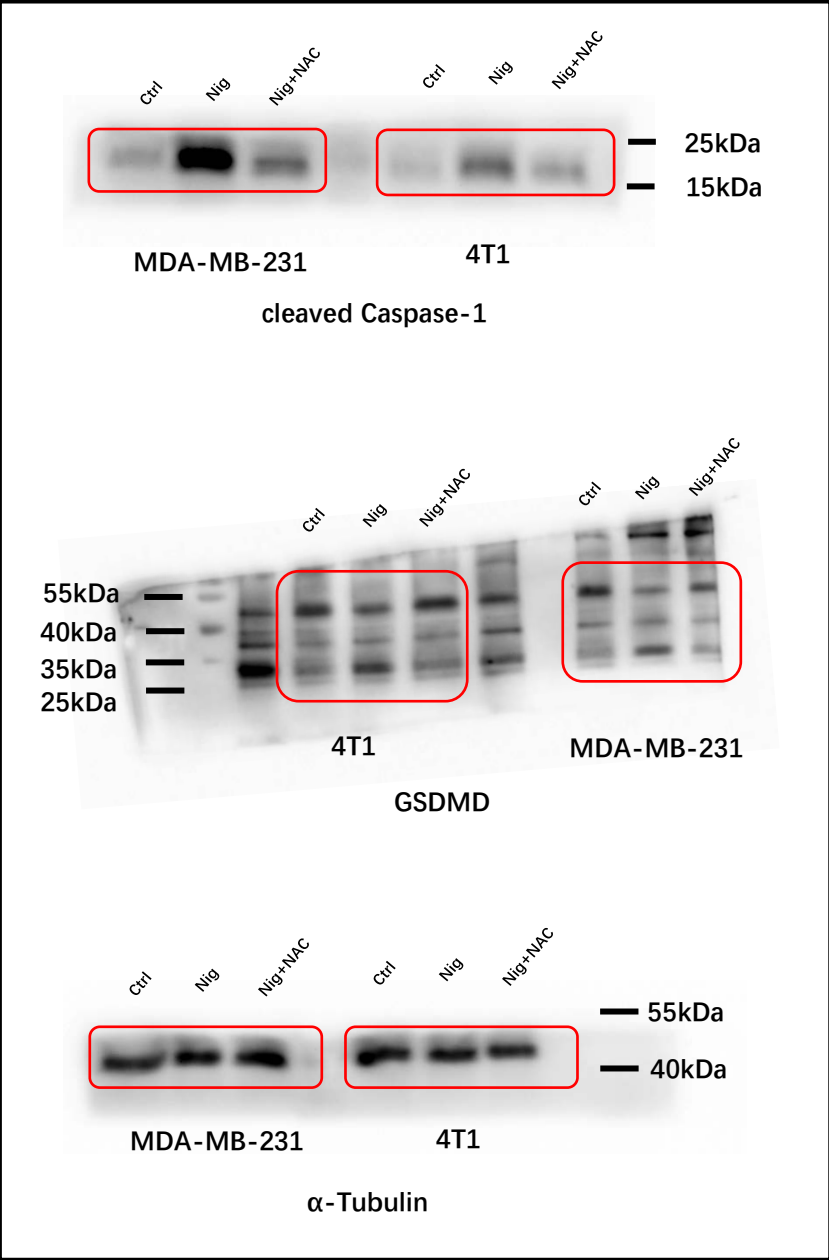

Experiment 3

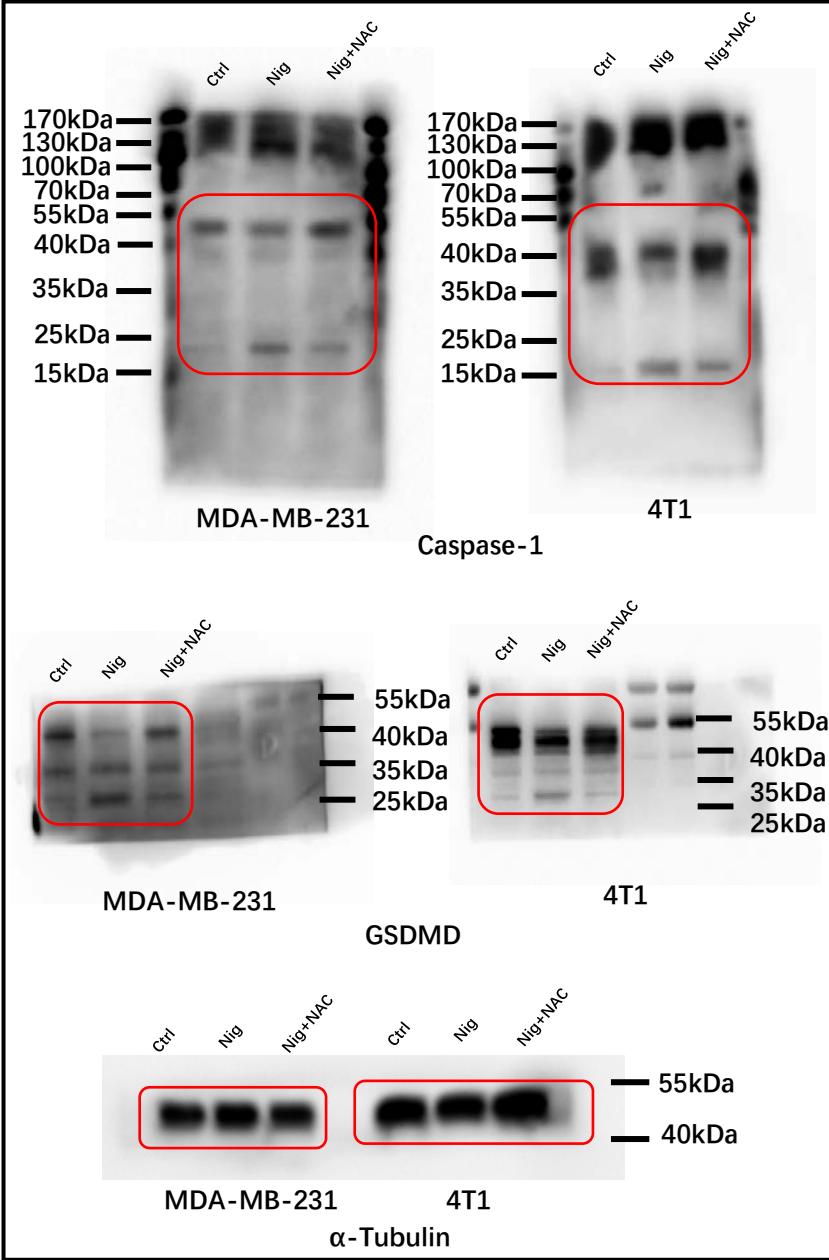

Figure S10 related to Figure 4C

Experiment 1

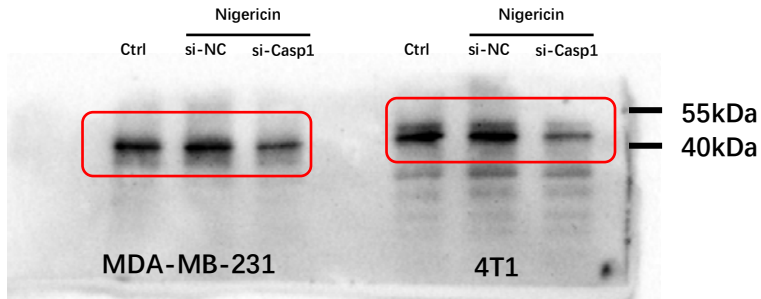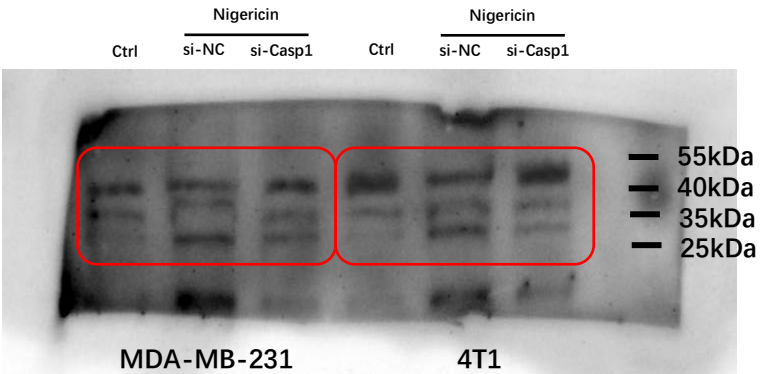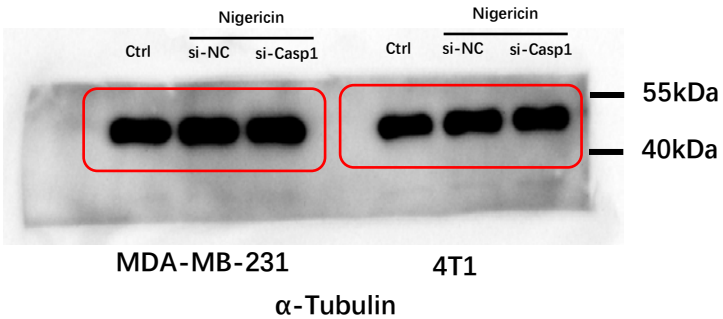

Experiment 2

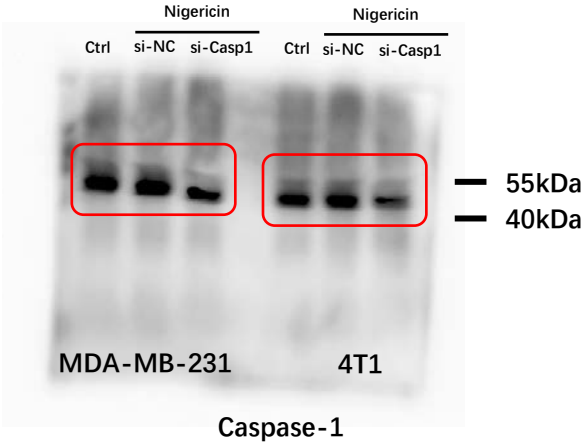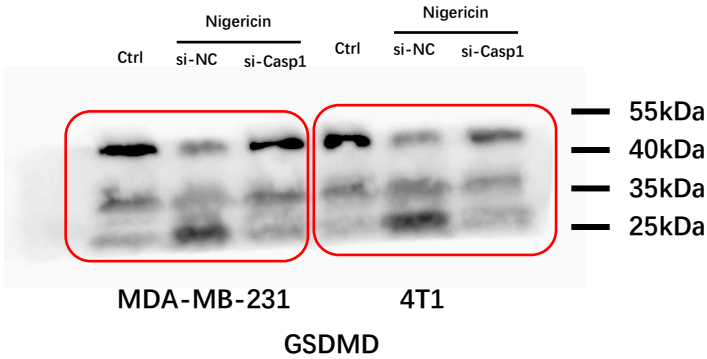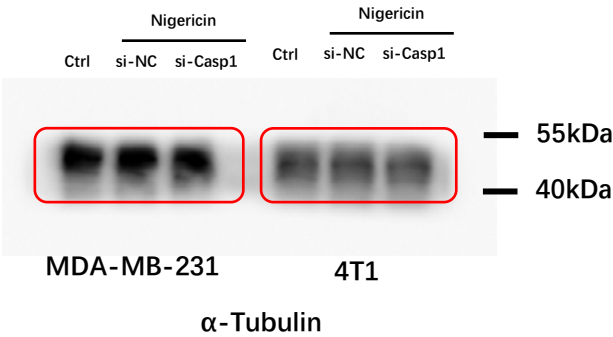

Experiment 3

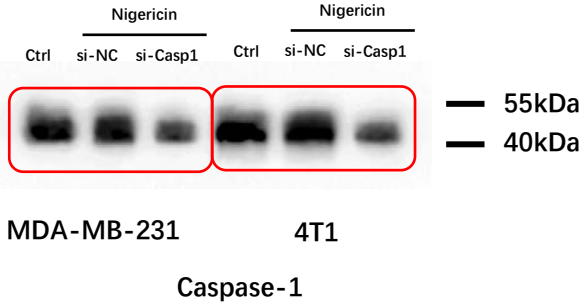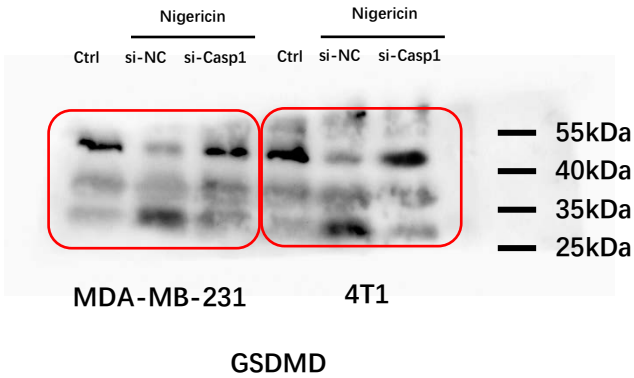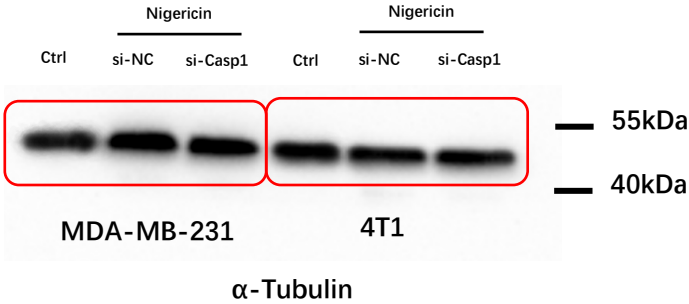

Figure S11 related to Figure 5A

Experiment 1

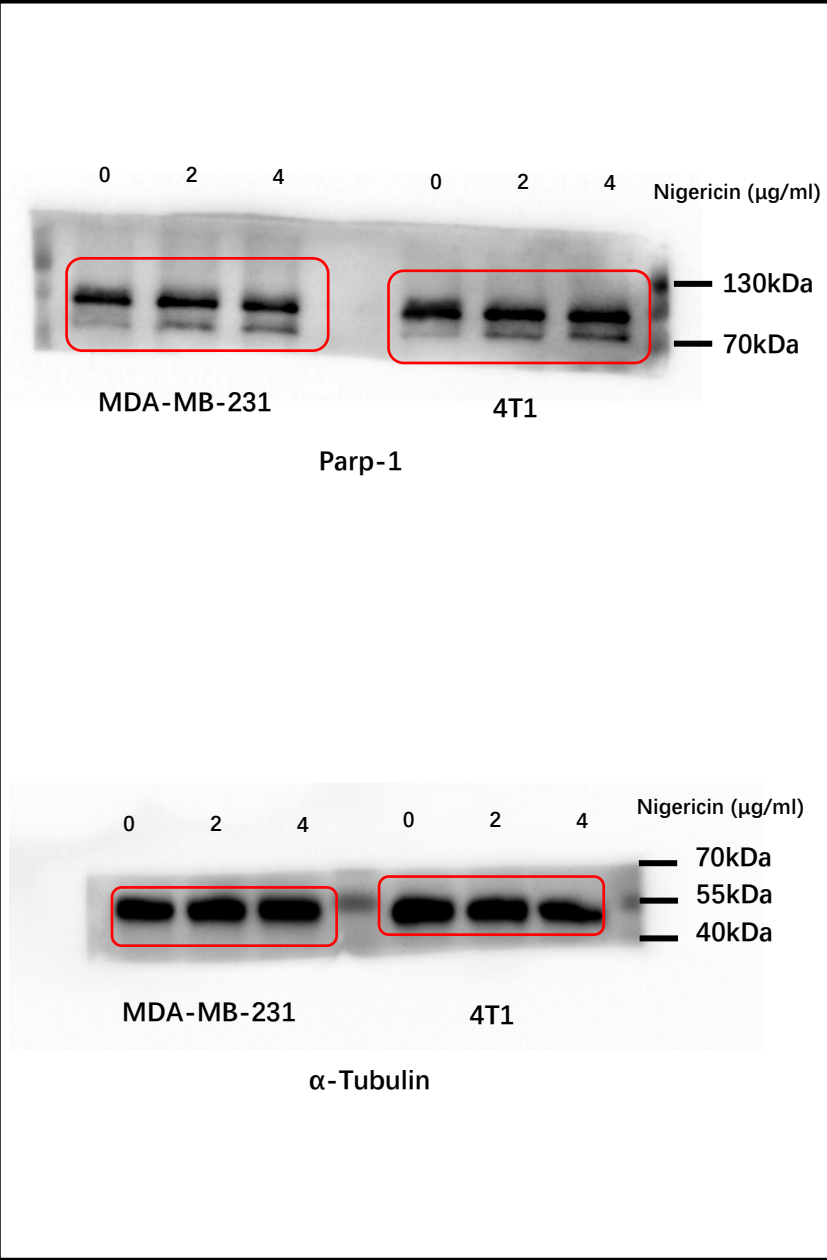

Experiment 2

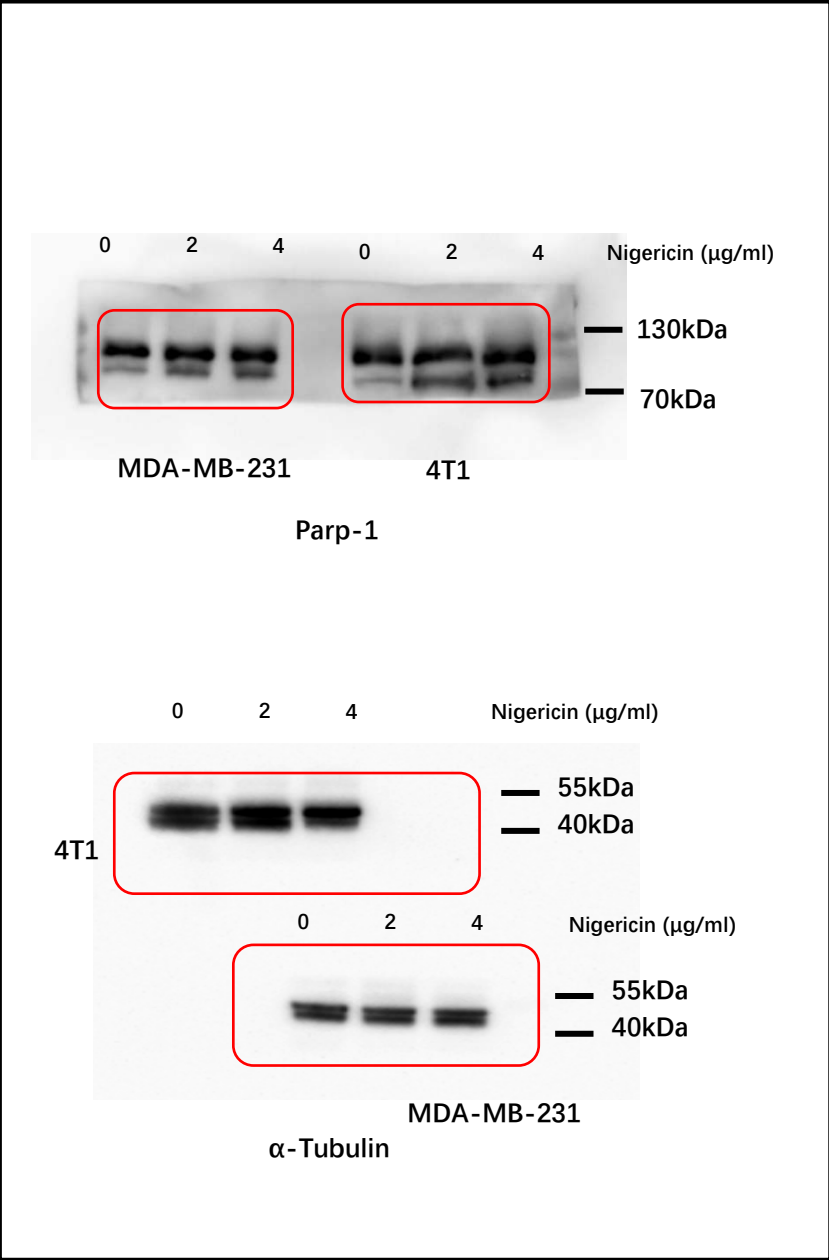

Experiment 3

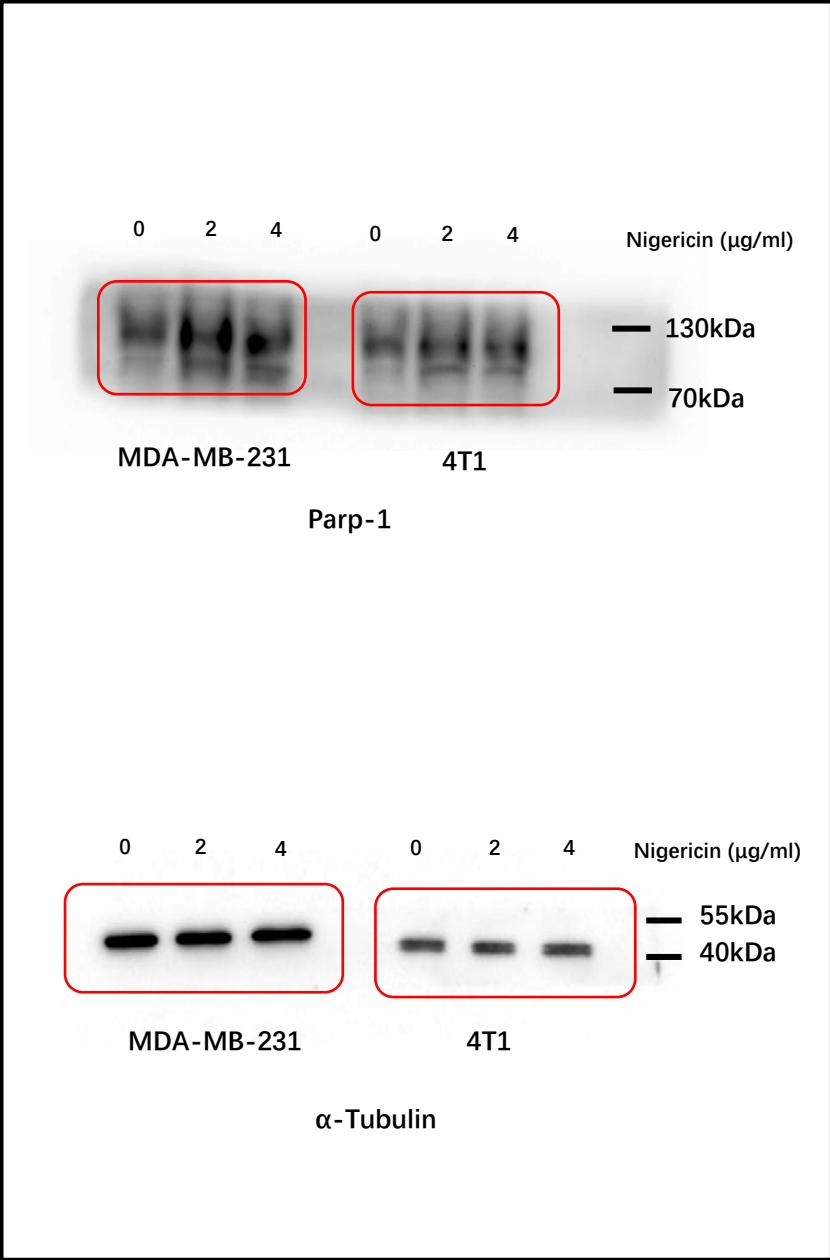



Figure S12 related to Figure 5B

Experiment 1

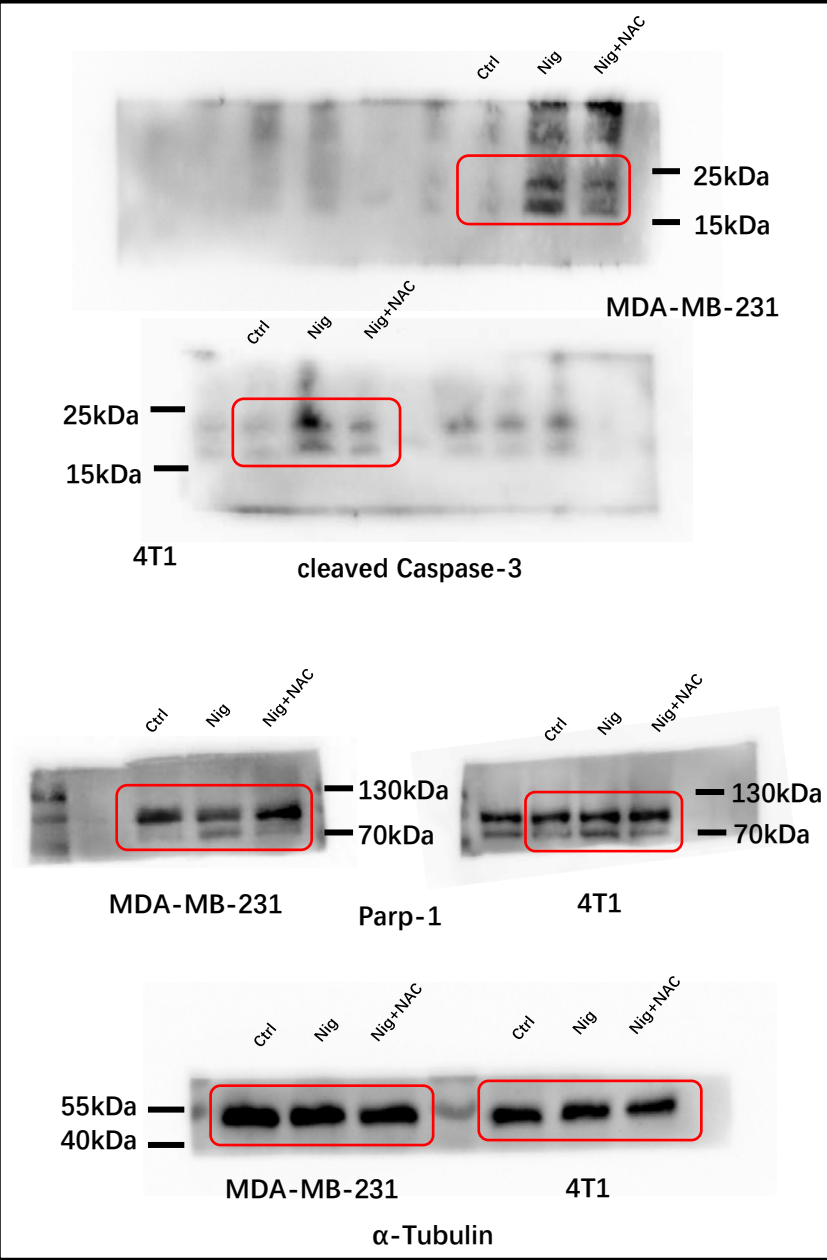

Experiment 2

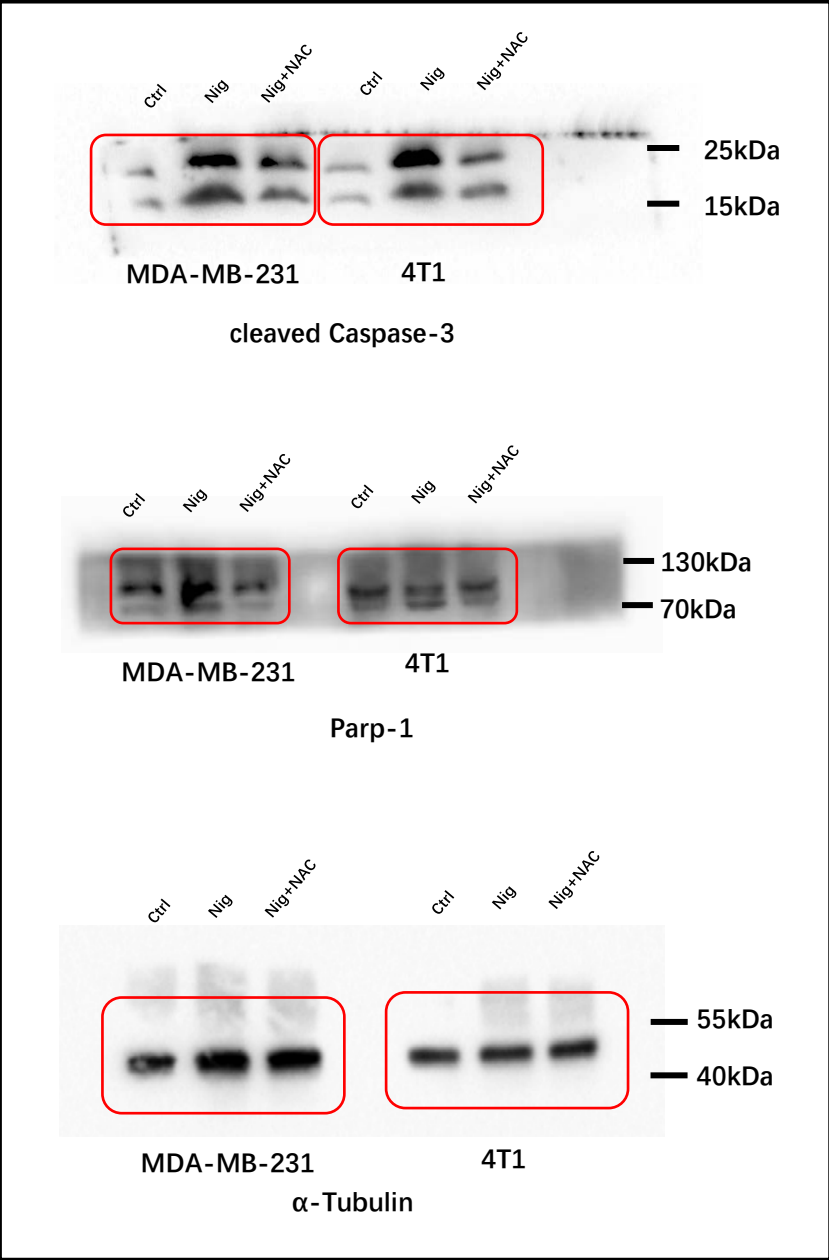

Experiment 3

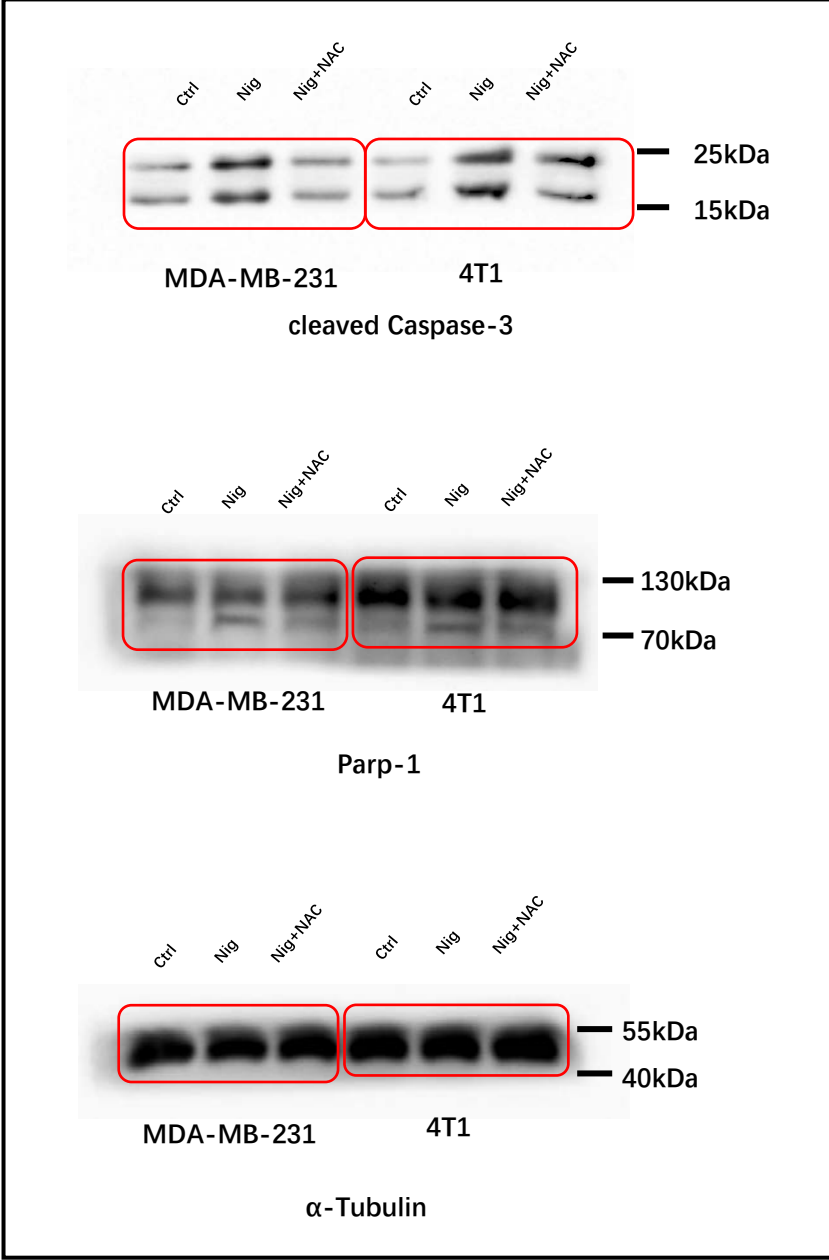



Figure S13 related to Figure 5C

Experiment 1

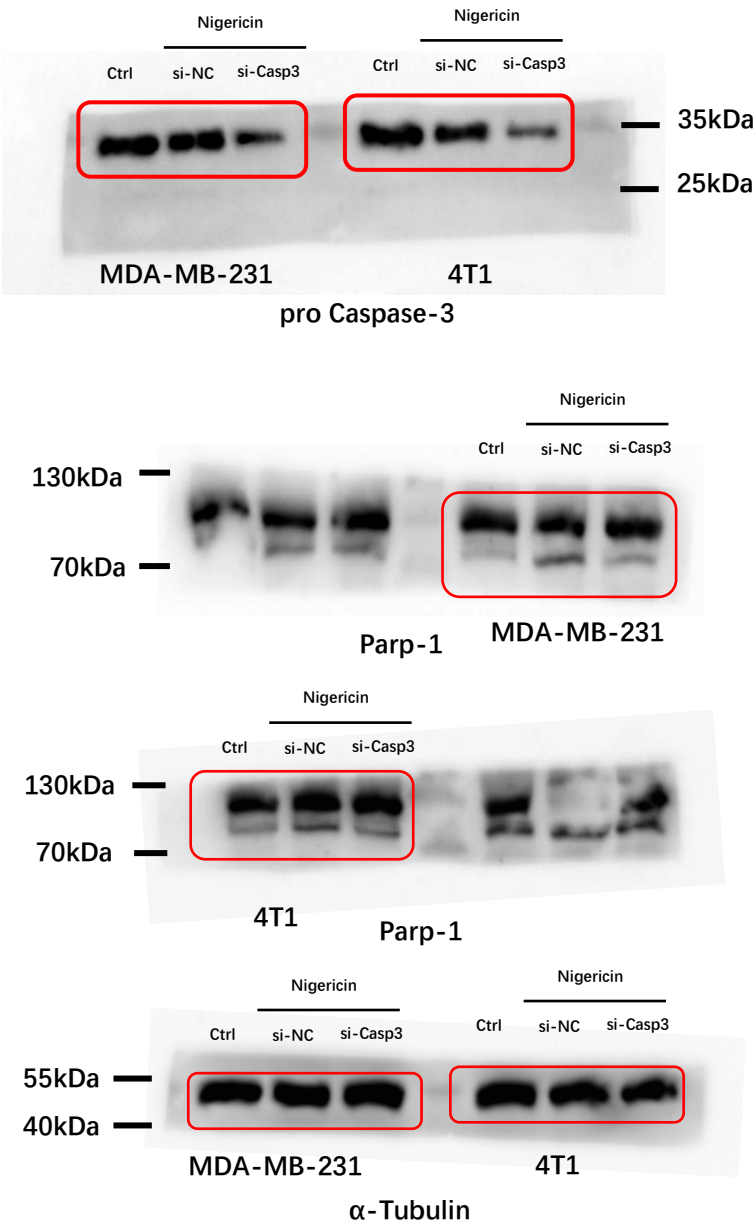

Experiment 2

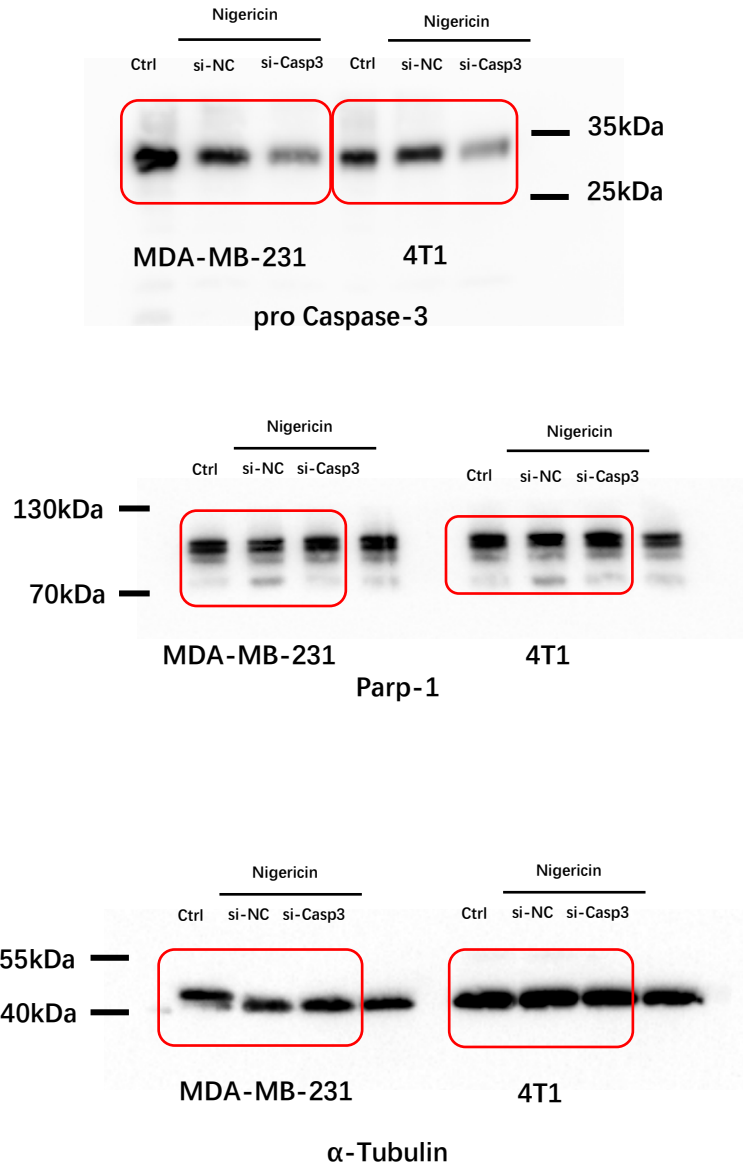

Experiment 3

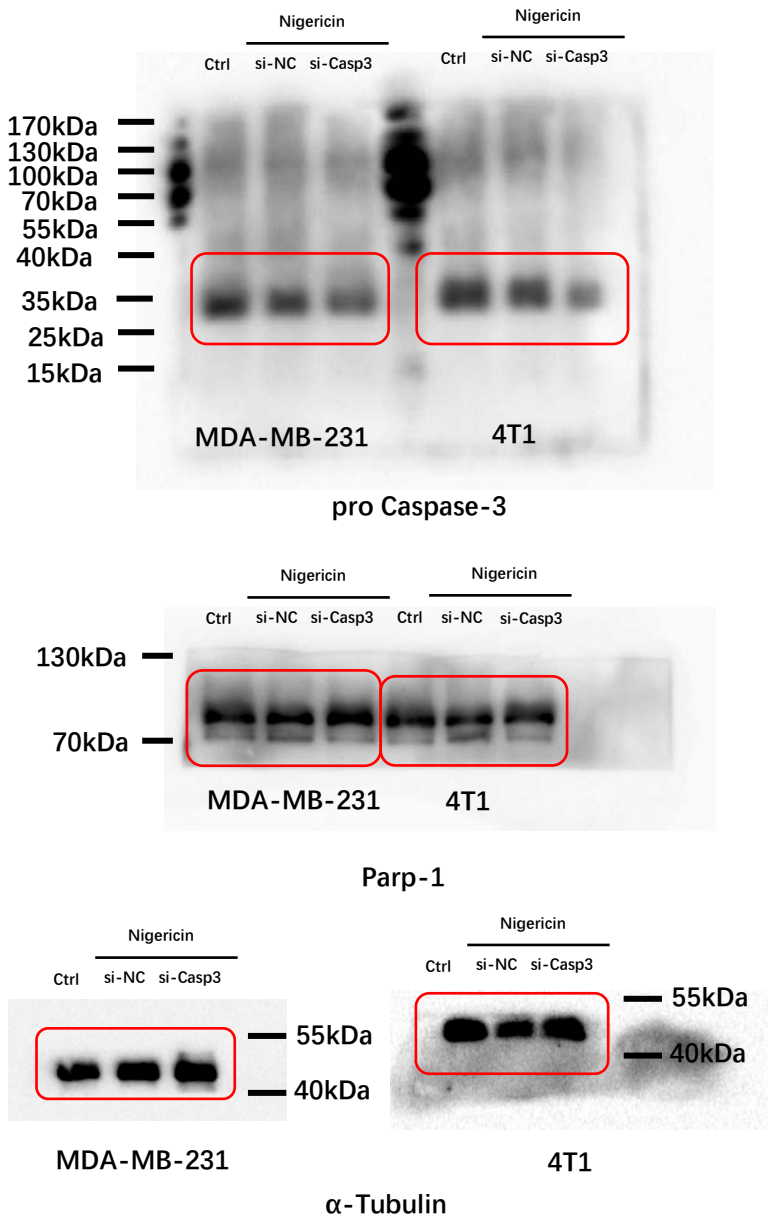

Figure S14 related to Figure S2A

Experiment 1

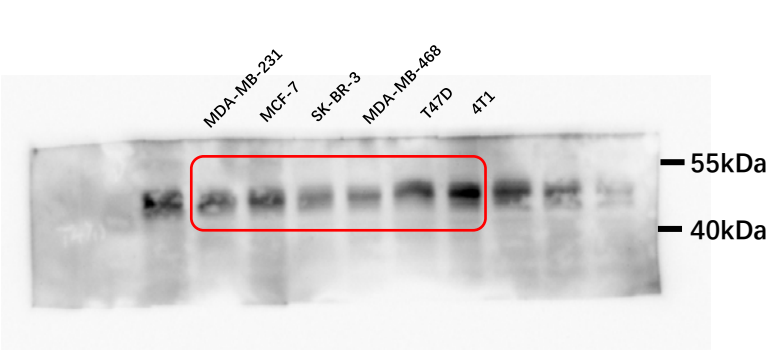

FL-GSDMD

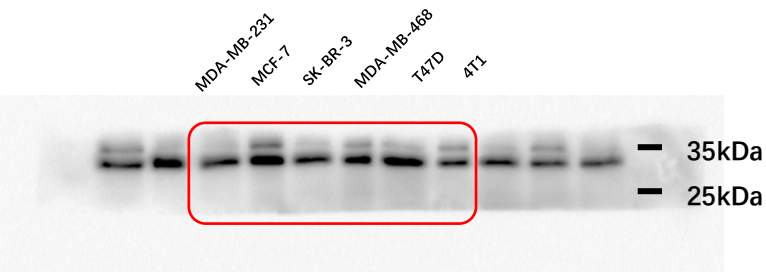

GAPDH

Experiment 2

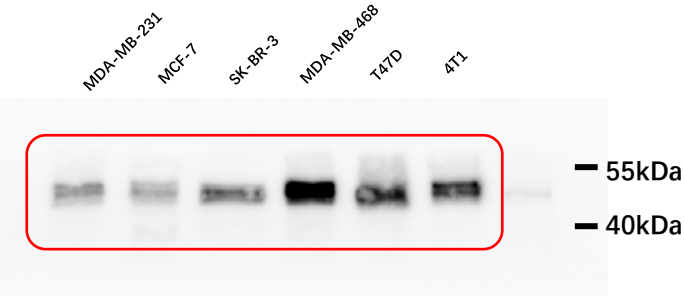

FL-GSDMD

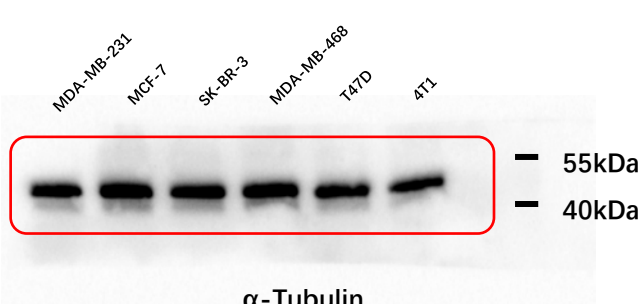

α-Tubulin

Experiment 3

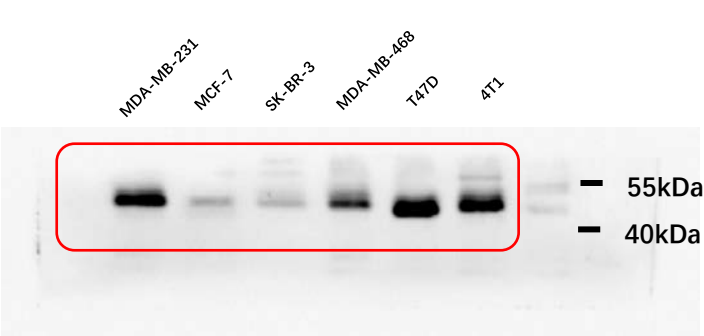

FL-GSDMD

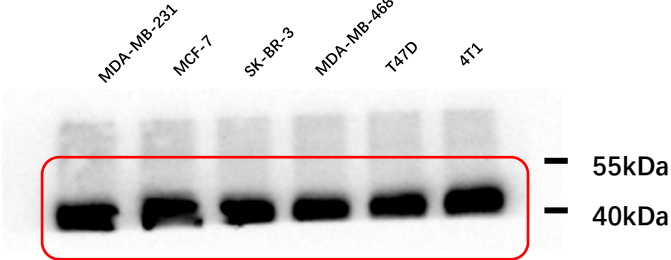

α-Tubulin

Figure S15 related to Figure S2D

Experiment 1

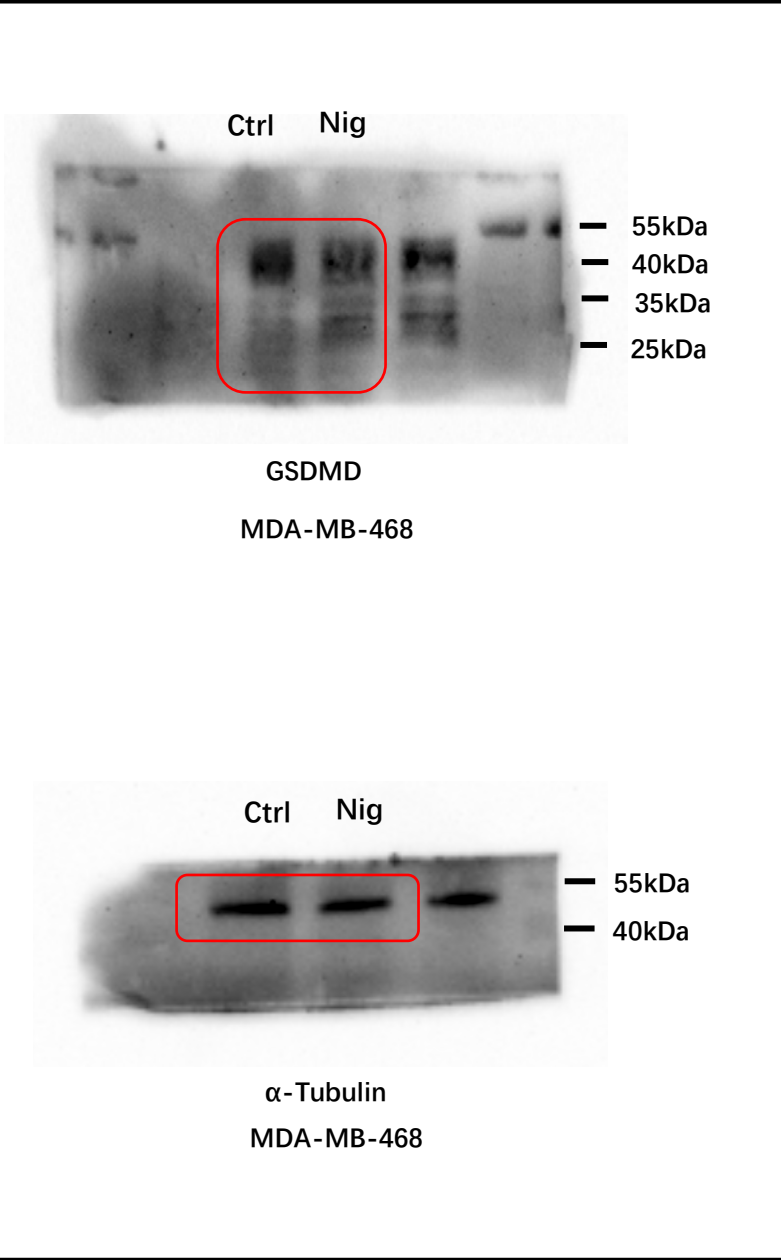

Experiment 2

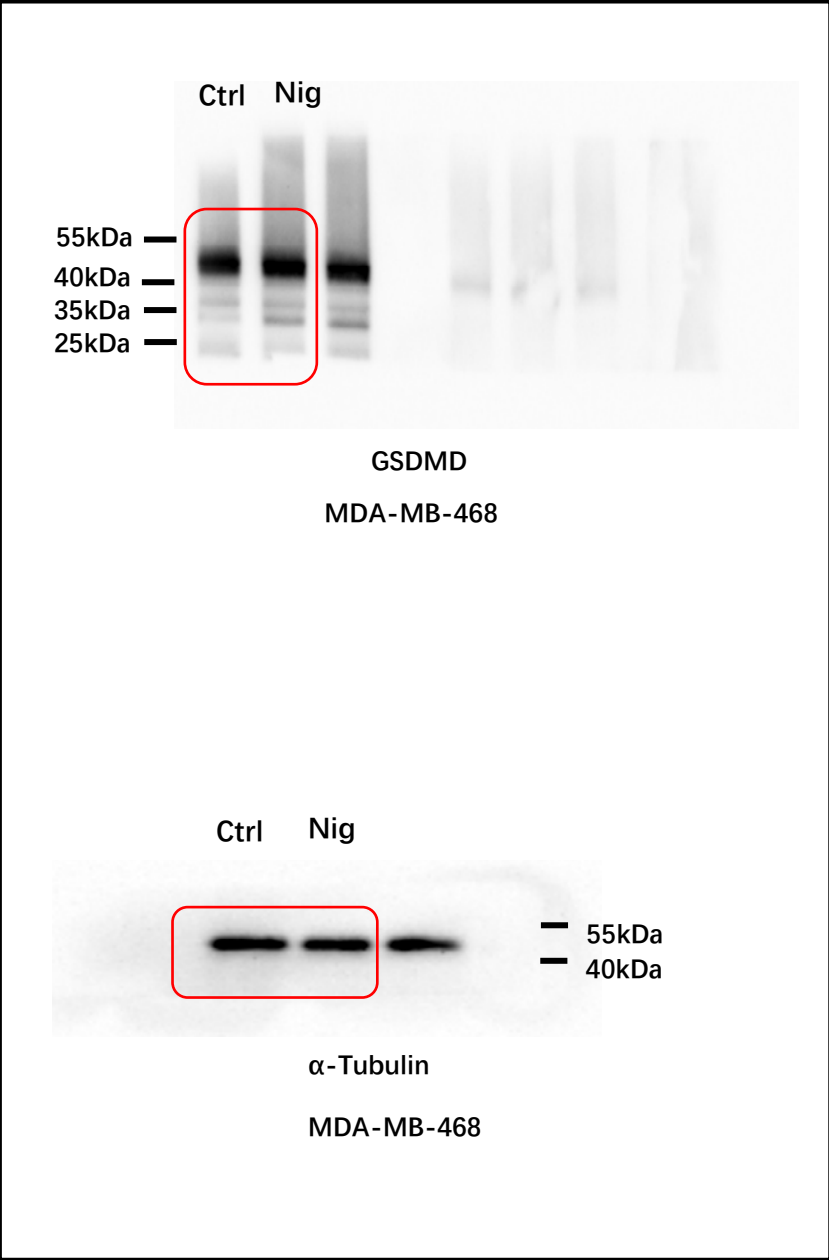

Experiment 3

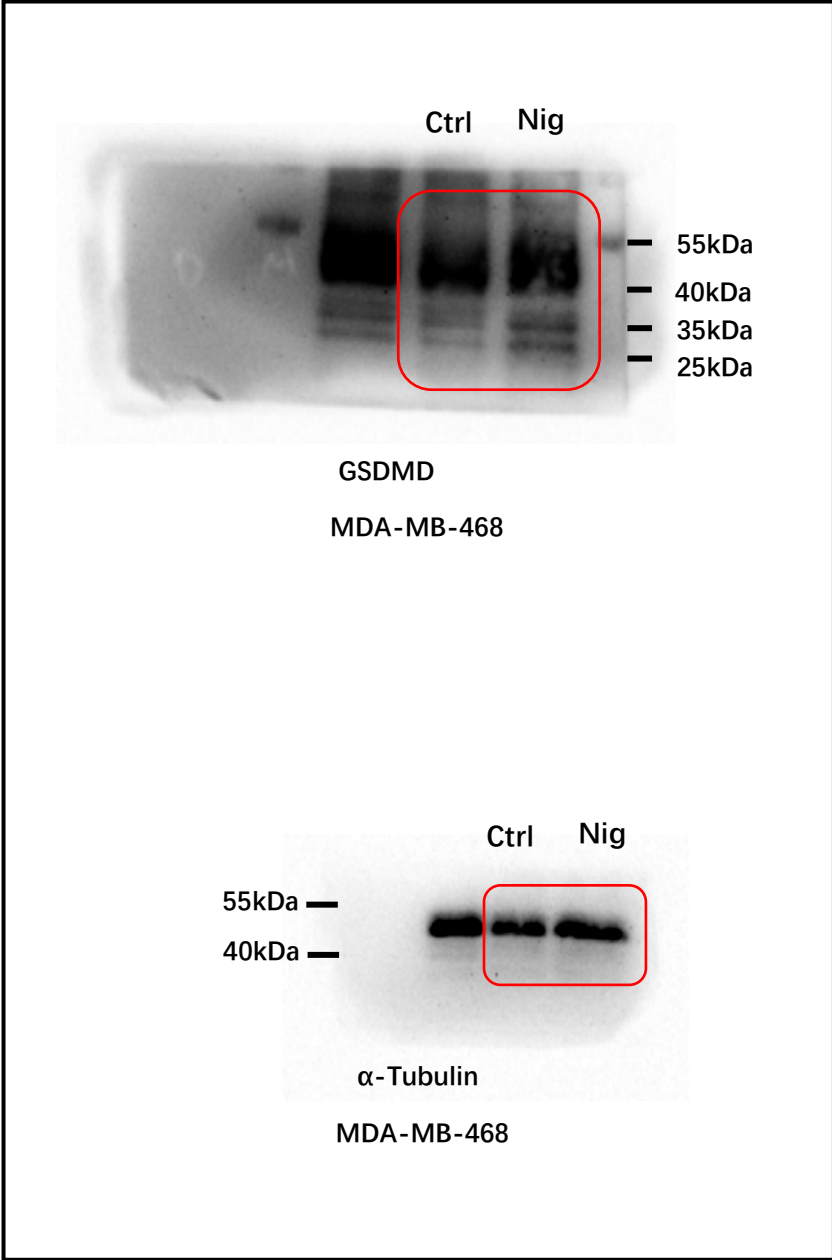

Supplement: s1 [file s1]
